# Supplementary material for: Predictive usefulness of RT-PCR testing in different patterns of Covid-19 symptomatology: analysis of a French cohort of 12,810 outpatients
Source: PubMed Central journal article supplement (PMC8551264; doi:10.1038/s41598-021-99991-6), 2021-10-27

Figure S1

# Questionnaire COVIDOM

(partial relevant extract)

|                                                                                                                                                                                                                                                                                                                                                                                                                                                                                                                                                                                                                                                                                                                                                                                                                                                                                                                                                                                                                                                                                                                                                                                                                                  |                                                                                                                                                                                                                                                                                                                                                                                                                                                                                                                                                                                                                                                                                                                                                                                                                                                                                                                                                                                                           |
|----------------------------------------------------------------------------------------------------------------------------------------------------------------------------------------------------------------------------------------------------------------------------------------------------------------------------------------------------------------------------------------------------------------------------------------------------------------------------------------------------------------------------------------------------------------------------------------------------------------------------------------------------------------------------------------------------------------------------------------------------------------------------------------------------------------------------------------------------------------------------------------------------------------------------------------------------------------------------------------------------------------------------------------------------------------------------------------------------------------------------------------------------------------------------------------------------------------------------------|-----------------------------------------------------------------------------------------------------------------------------------------------------------------------------------------------------------------------------------------------------------------------------------------------------------------------------------------------------------------------------------------------------------------------------------------------------------------------------------------------------------------------------------------------------------------------------------------------------------------------------------------------------------------------------------------------------------------------------------------------------------------------------------------------------------------------------------------------------------------------------------------------------------------------------------------------------------------------------------------------------------|
| <p>1. Principaux antécédents</p> <p>Quel est votre poids habituel ? kg<br/>Quelle est votre taille ? cm</p> <p>Souffrez-vous de diabète ? oui/non<br/>Souffrez-vous d'hypertension ? oui/non<br/>Souffrez-vous de BPCO ou d'emphysème ?<br/>oui/non<br/>Souffrez-vous d'asthme ? oui/non<br/>Souffrez-vous d'infarctus ou d'angine de<br/>poitrine ? oui/non<br/>Souffrez-vous d'insuffisance cardiaque ?<br/>oui/non<br/>Souffrez-vous d'un cancer en cours de<br/>traitement ? oui/non<br/>Souffrez-vous d'insuffisance rénale ? oui/non<br/>Souffrez-vous d'une autre maladie<br/>chronique ? oui/non ; Précisez</p> <p>Êtes-vous fumeur ? oui/non</p> <p>2. Symptômes</p> <p>Avez-vous, au cours de votre maladie,<br/>présenté l'un ou les symptômes suivants ?<br/>cases à cocher</p> <p>Fatigue<br/>Fièvre (température &gt;38°5C)<br/>Frissons<br/>Toux<br/>Gêne respiratoire (essoufflement)<br/>Douleurs musculaires (myalgies)<br/>Sensation d'oppression thoracique de<br/>plusieurs minutes<br/>Douleurs thoraciques<br/>Diarrhées<br/>Nausées, vomissements<br/>Perte de l'odorat<br/>Perte du goût<br/>Manque d'appétit<br/>Eruption cutanée, urticaire<br/>Engelures<br/>Conjonctivite<br/>Autres (Précisez)</p> | <p>1. Medical history</p> <p>What is your usual weight ? kg<br/>What is your height ? cm</p> <p>Do you have diabetes ? yes / no<br/>Do you have hypertension ? yes / no<br/>Do you have COPD or emphysema ? yes / no<br/>Do you have asthma ? yes / no<br/>Do you have heart infarct or angina ? yes / no<br/>Do you have heart failure ? yes / no<br/>Do you have cancer with ongoing treatment ?<br/>yes / no<br/>Do you have chronic kidney disease ? yes / no<br/>Do you have other chronical diseases ? yes/no;<br/>Precise</p> <p>Do you smoke ? yes / no</p> <p>2. Symptoms</p> <p>During your disease, did you have any of the<br/>following signs ?</p> <p>Tiredness<br/>Fever<br/>Shivers<br/>Cough<br/>Breathlessness<br/>Aches in the muscles<br/>Chest oppression lasting several minutes</p> <p>Chest pain<br/>Diarrhea<br/>Nausea, vomiting<br/>Loss of smell<br/>Loss of appetite<br/>Lack of appetite<br/>Rash, hives<br/>Frostbites<br/>Conjunctivitis<br/>Other symptoms (Precise)</p> |
|----------------------------------------------------------------------------------------------------------------------------------------------------------------------------------------------------------------------------------------------------------------------------------------------------------------------------------------------------------------------------------------------------------------------------------------------------------------------------------------------------------------------------------------------------------------------------------------------------------------------------------------------------------------------------------------------------------------------------------------------------------------------------------------------------------------------------------------------------------------------------------------------------------------------------------------------------------------------------------------------------------------------------------------------------------------------------------------------------------------------------------------------------------------------------------------------------------------------------------|-----------------------------------------------------------------------------------------------------------------------------------------------------------------------------------------------------------------------------------------------------------------------------------------------------------------------------------------------------------------------------------------------------------------------------------------------------------------------------------------------------------------------------------------------------------------------------------------------------------------------------------------------------------------------------------------------------------------------------------------------------------------------------------------------------------------------------------------------------------------------------------------------------------------------------------------------------------------------------------------------------------|

|                                                                                                                                                                                                                                                                                                                                              |                                                                                                                                                                                                                                                                                  |
|----------------------------------------------------------------------------------------------------------------------------------------------------------------------------------------------------------------------------------------------------------------------------------------------------------------------------------------------|----------------------------------------------------------------------------------------------------------------------------------------------------------------------------------------------------------------------------------------------------------------------------------|
| <p>3. Examens complémentaires</p> <p>Avez-vous eu un test de l'infection à Covid-19 ? oui/non<br/>Etait-il positif / négatif ?</p> <p>Avez-vous passé un scanner des poumons dans le cadre de cet épisode infectieux ?<br/>oui/non</p> <p>Avez-vous passé une radiographie des poumons dans le cadre de cet épisode infectieux ? oui/non</p> | <p>3. Investigations</p> <p>Did you benefit from a Covid-19 test ? yes/no<br/>Was it positive / negative for Covid ?</p> <p>Did you have a lung scan as part of this infectious episode? yes/no</p> <p>Did you have a chest X-ray as part of this infectious episode? yes/no</p> |
|----------------------------------------------------------------------------------------------------------------------------------------------------------------------------------------------------------------------------------------------------------------------------------------------------------------------------------------------|----------------------------------------------------------------------------------------------------------------------------------------------------------------------------------------------------------------------------------------------------------------------------------|

Figure S2

a.

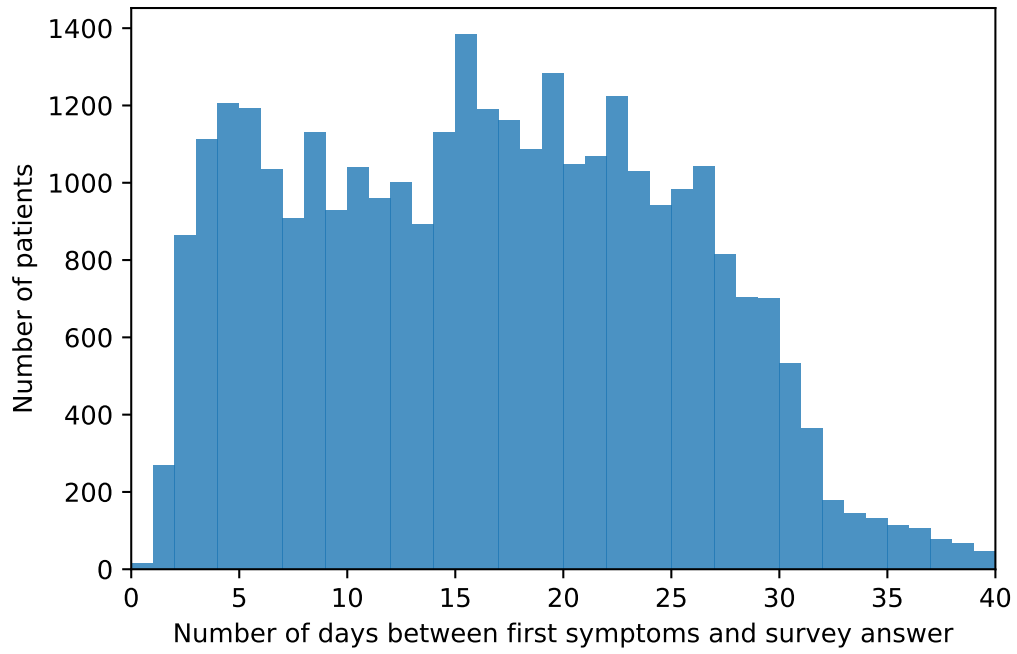

b.

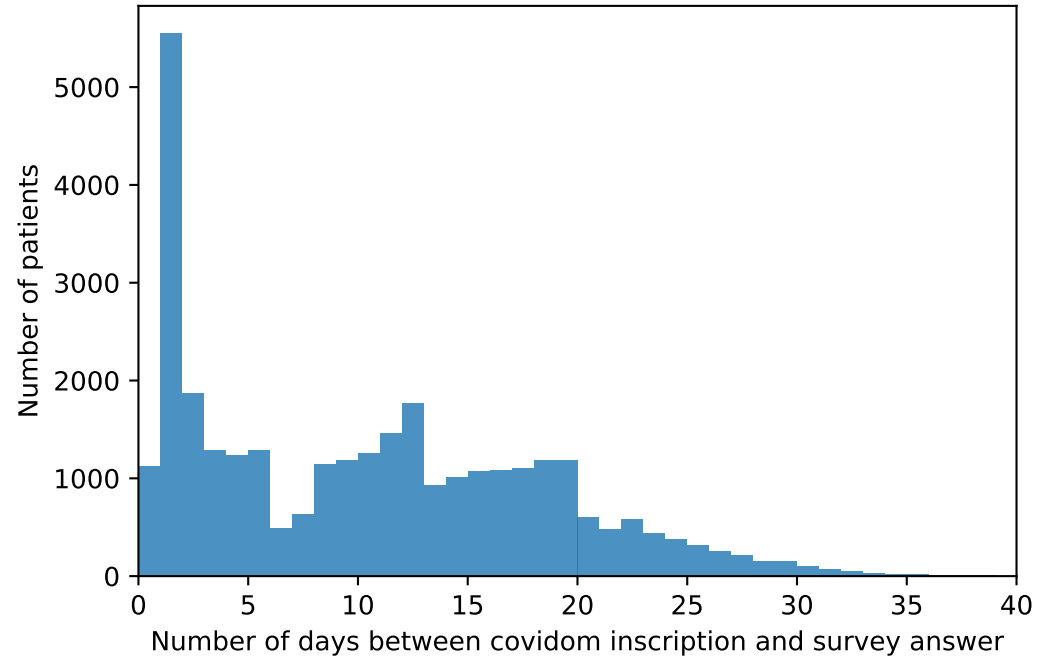

Figure S3

a.

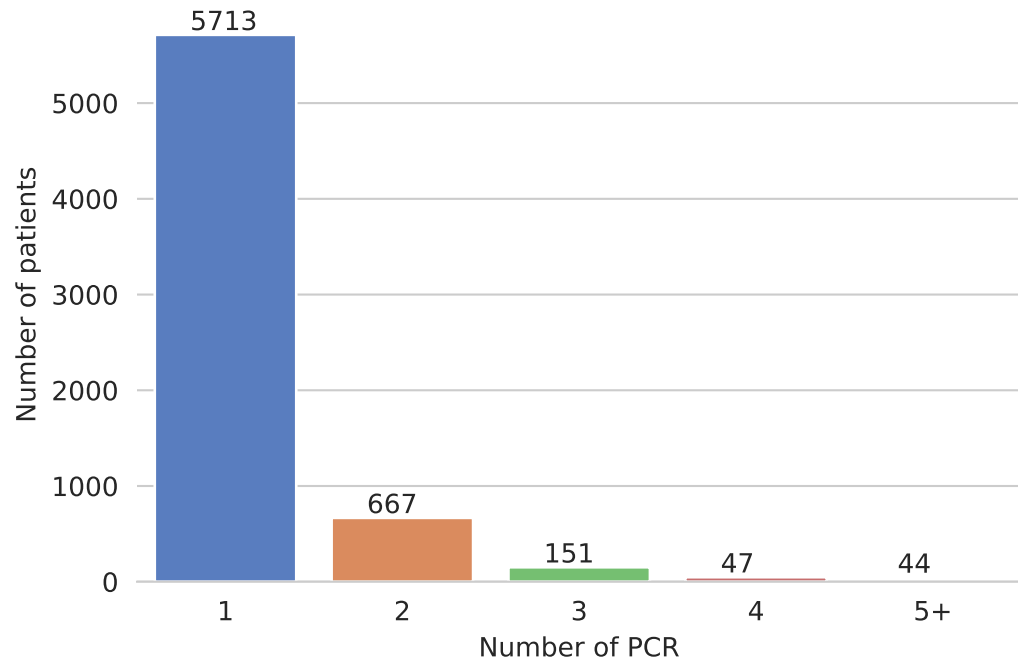

b.

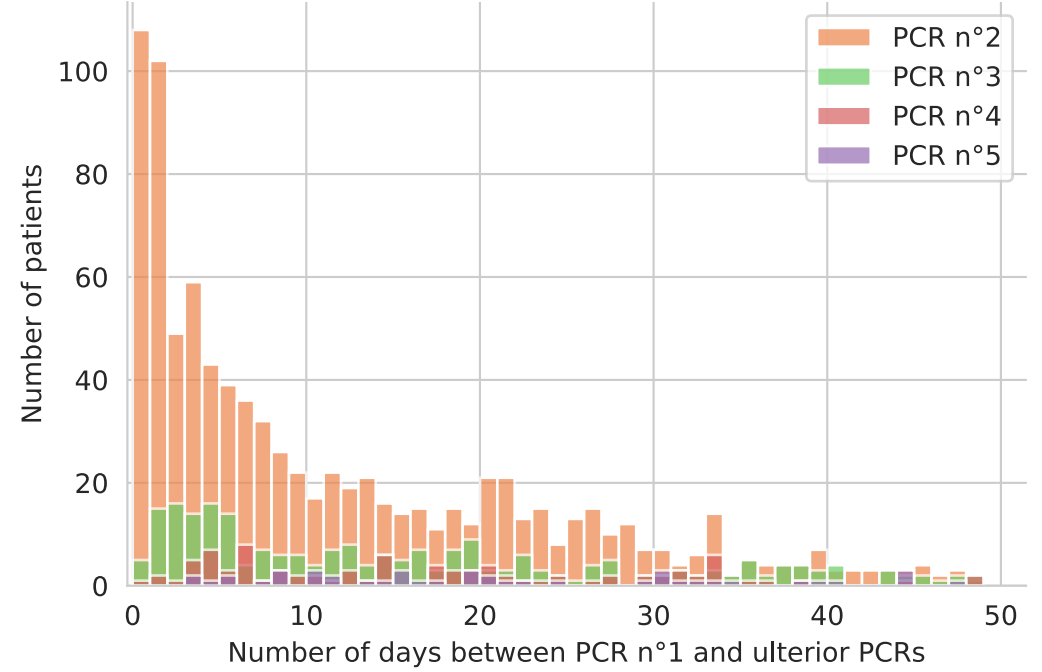

Figure S4



a. Representation of co-variables within the PCR+/PCR- populations

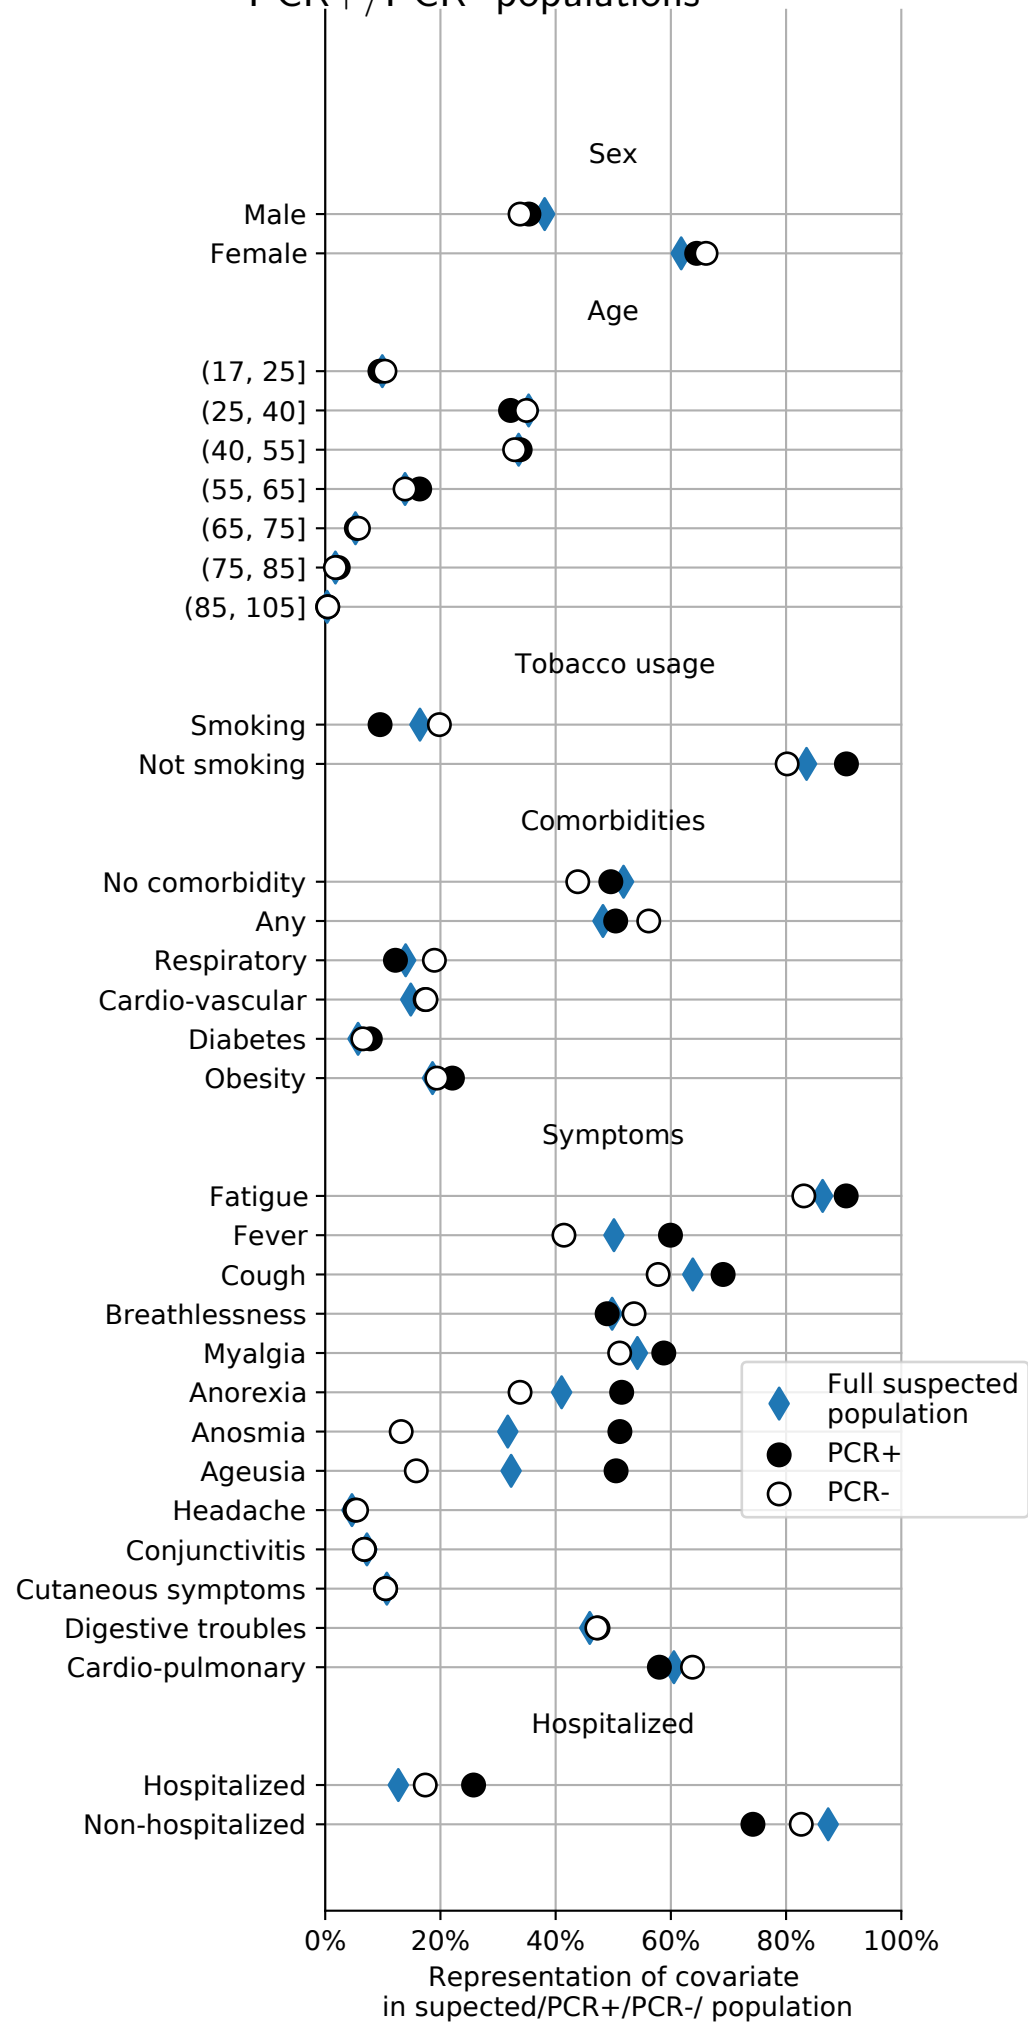

b. Predictivity of PCR positivity from single covariates

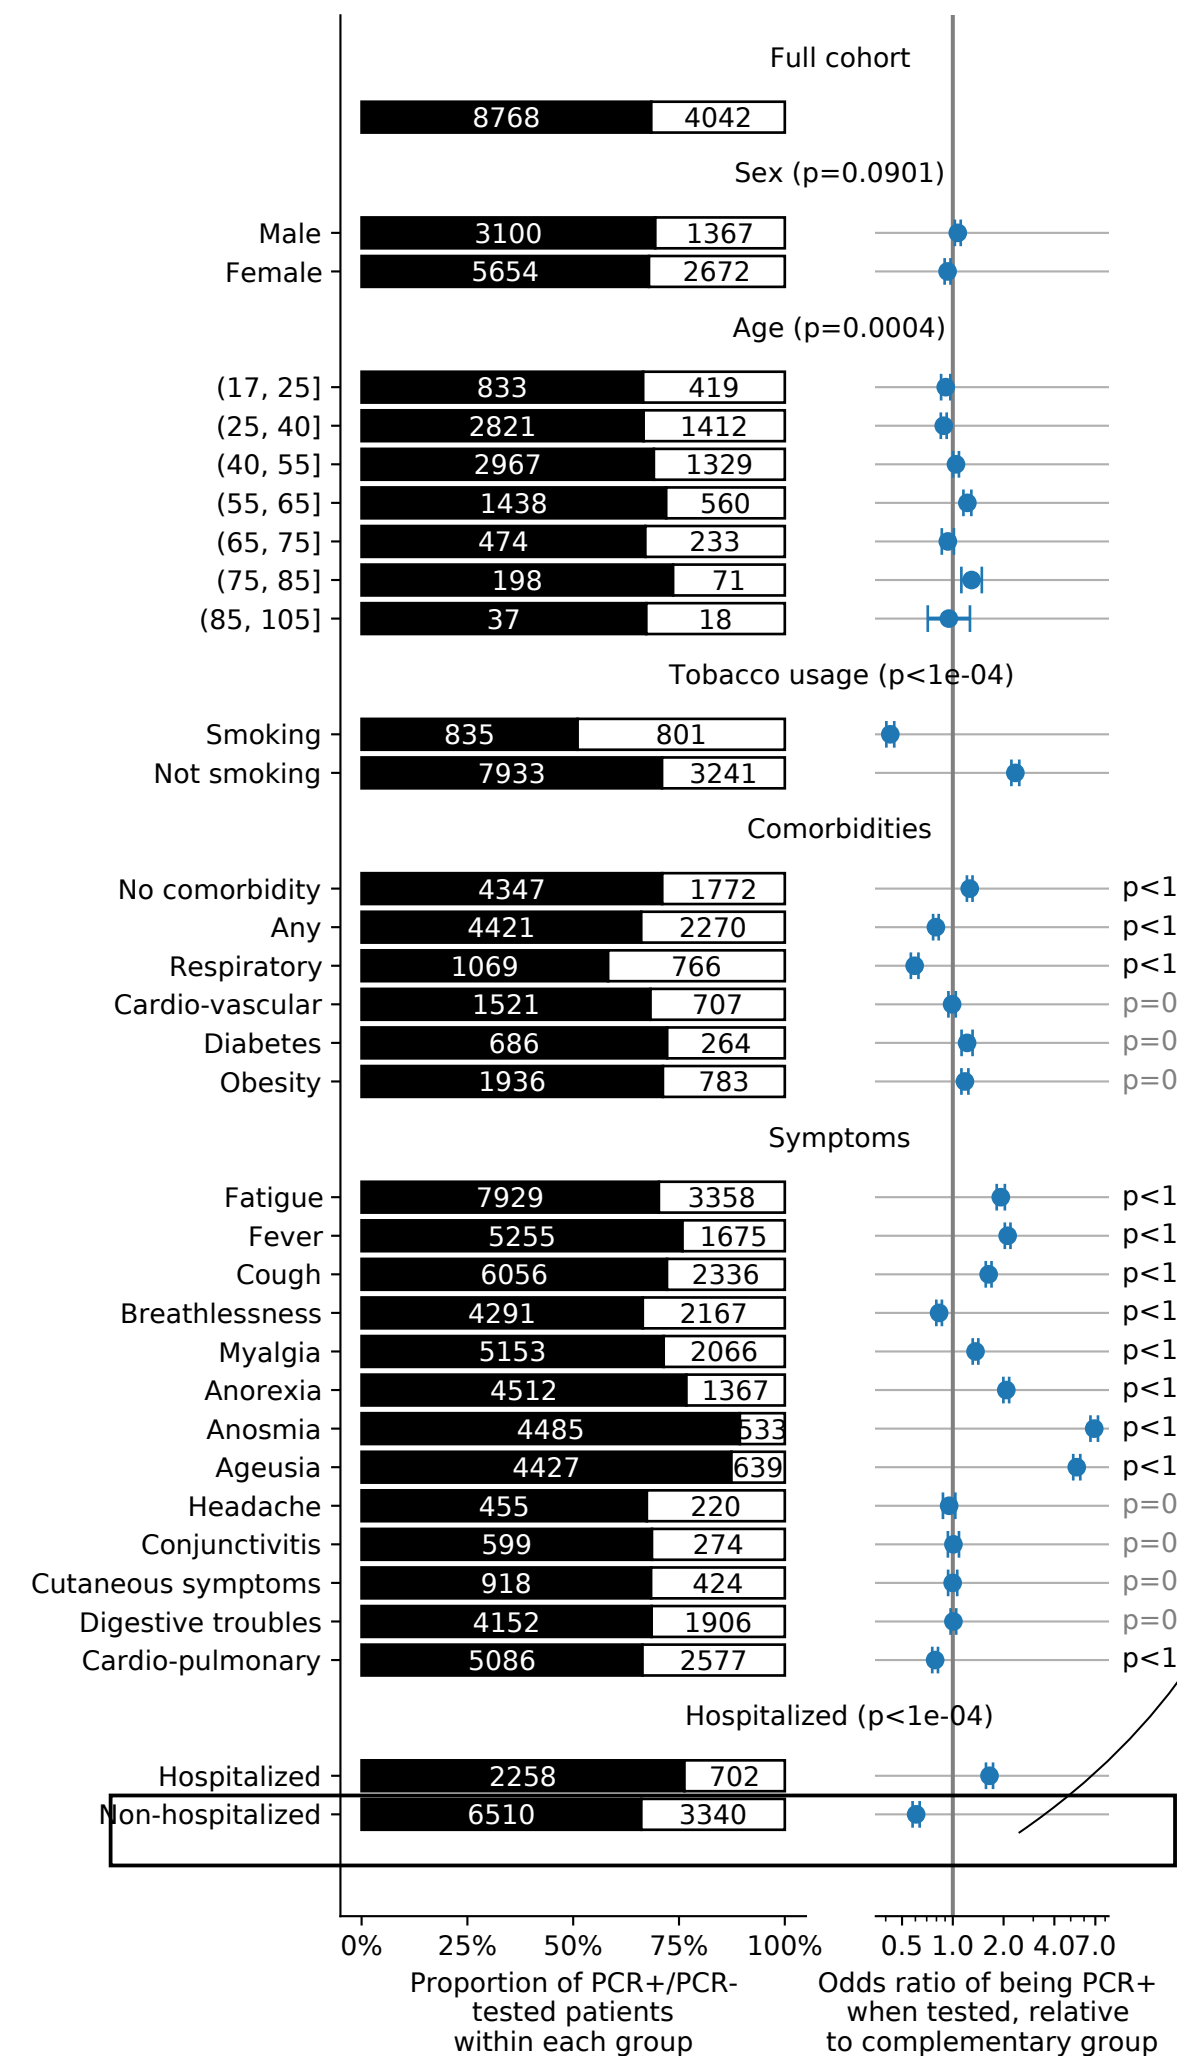

Analysis within non-hospitalized group

c. Predictivity of PCR positivity from single covariates (non-hospitalized patients only)

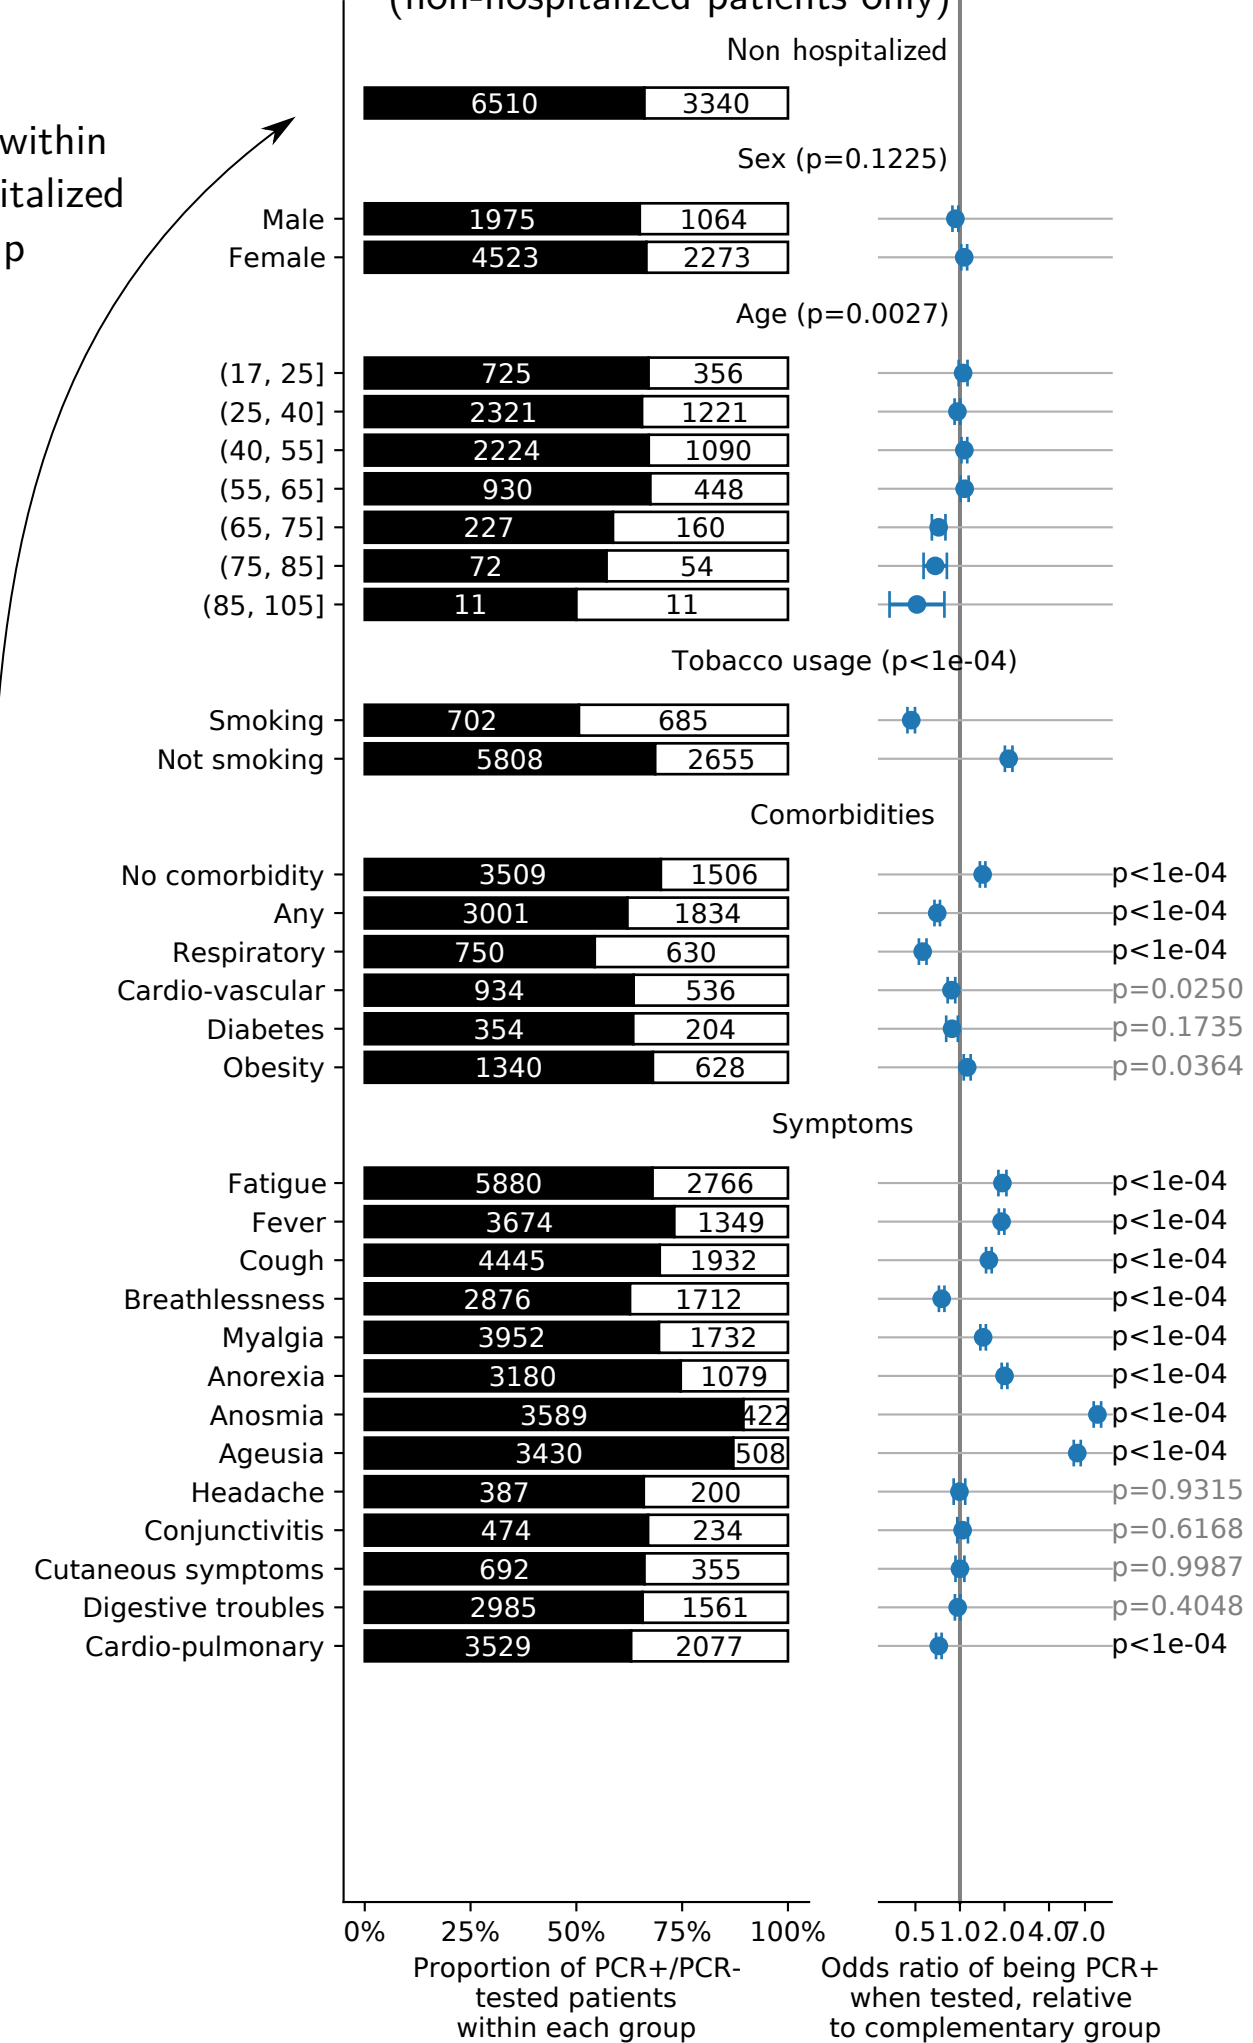

Figure S5

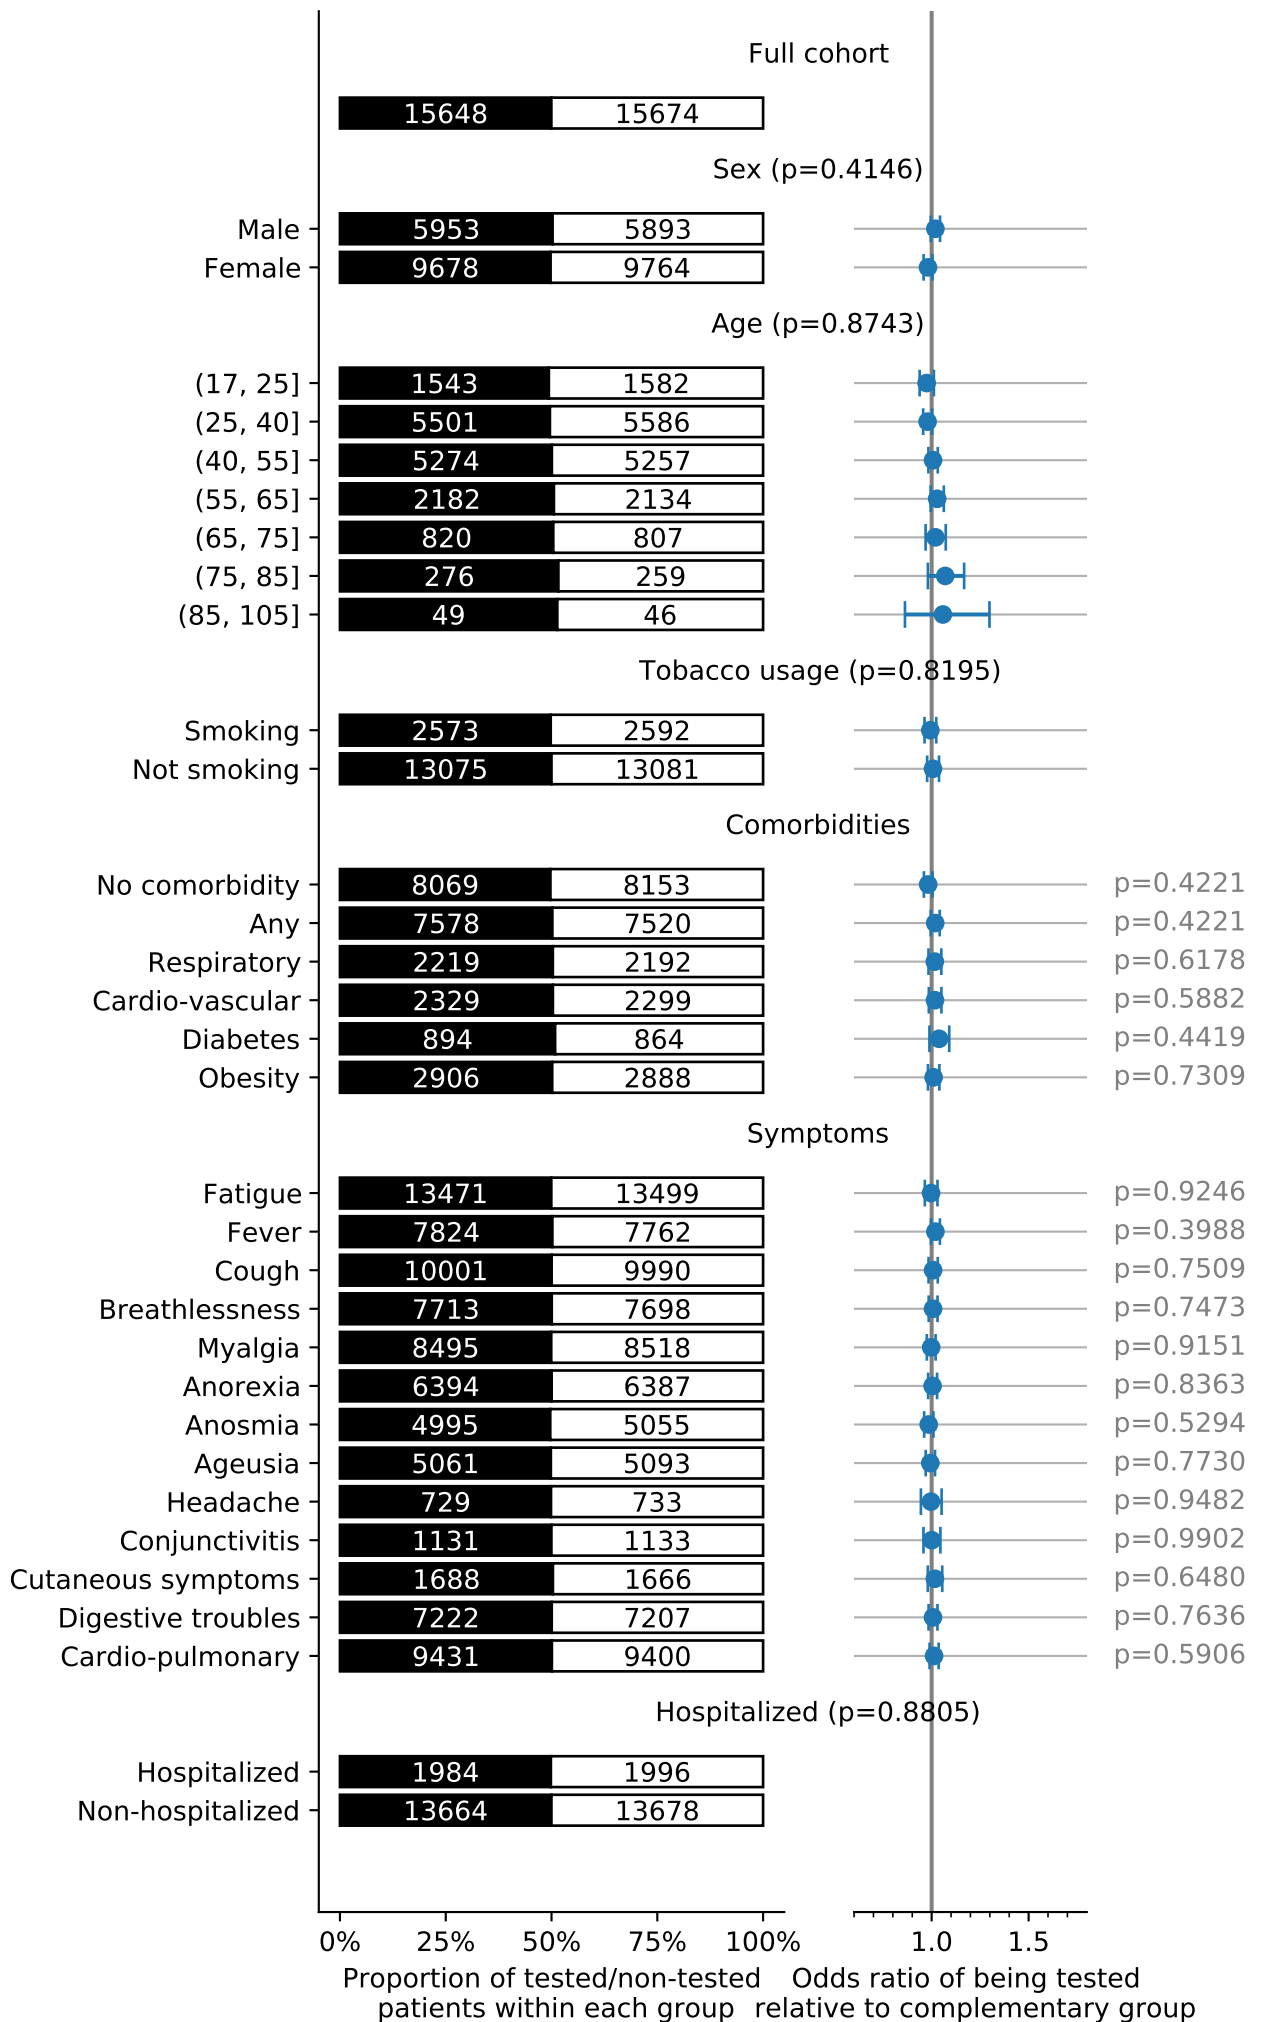

Figure S6

# Full decision tree to predict PCR on held-out patients

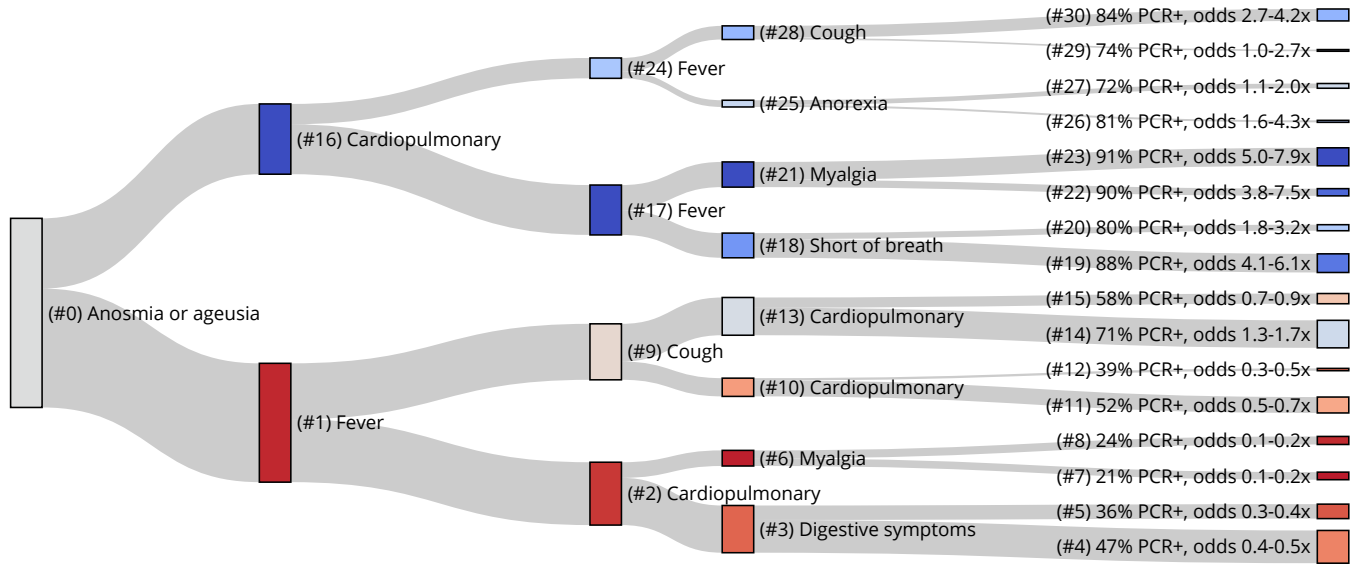

Figure S7

# Decision tree to predict PCR on the entire tested cohort

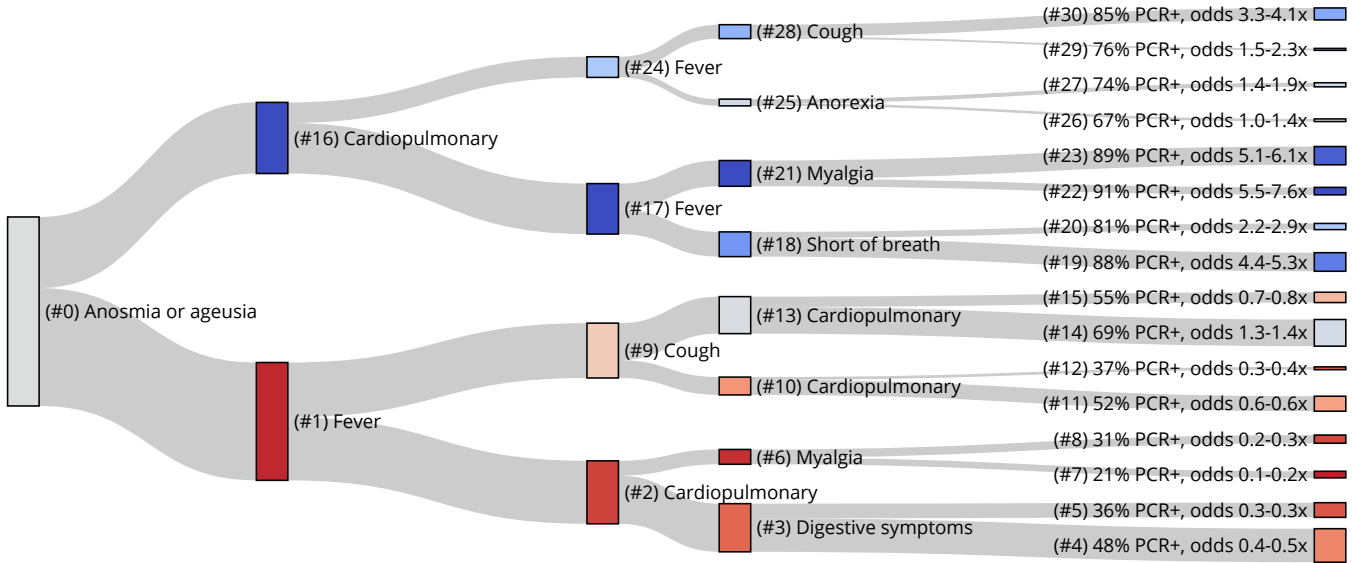

Figure S8



Feature permutation importance on test sets  
for 5 cross validation splits

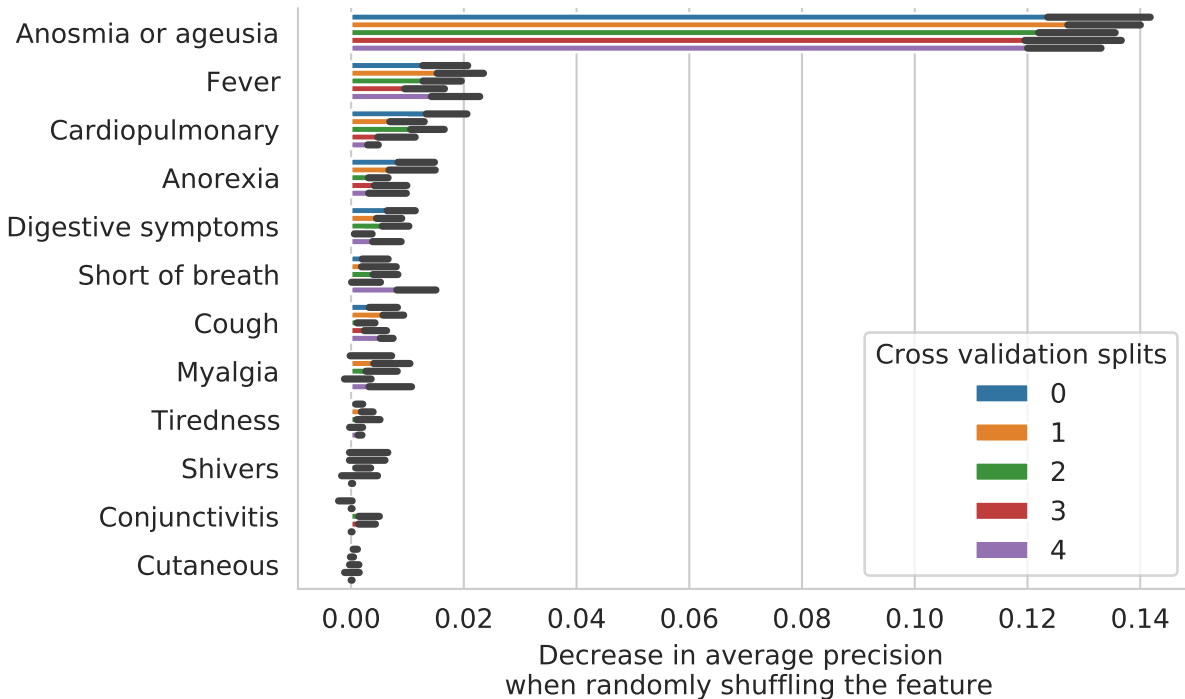

Figure S9

Precision recall curve on test set  
for 5 cross validation splits

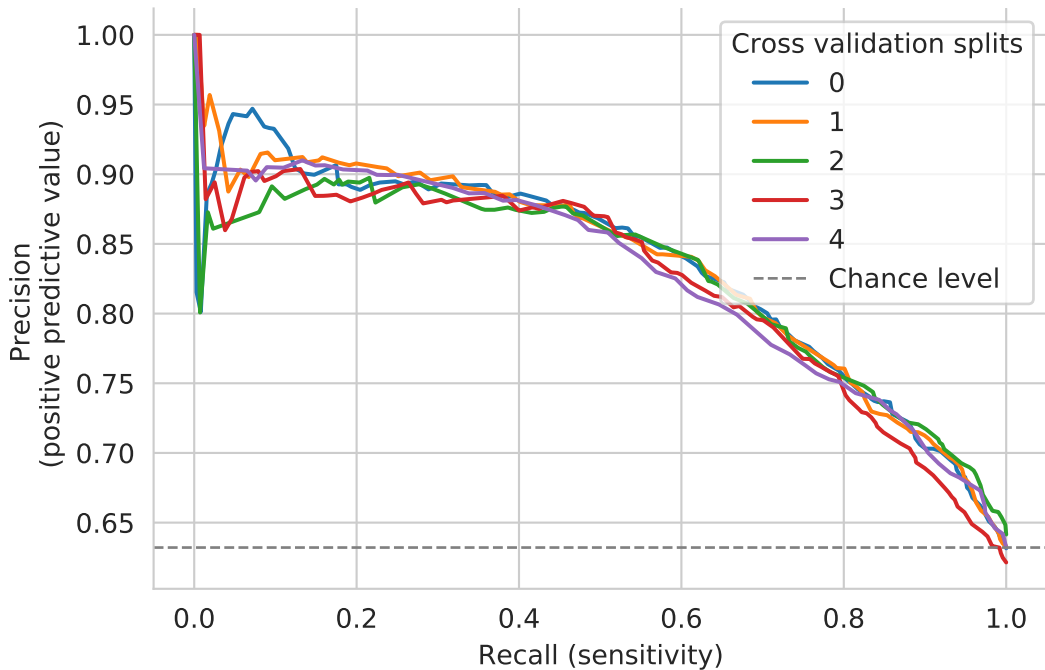

Figure S10

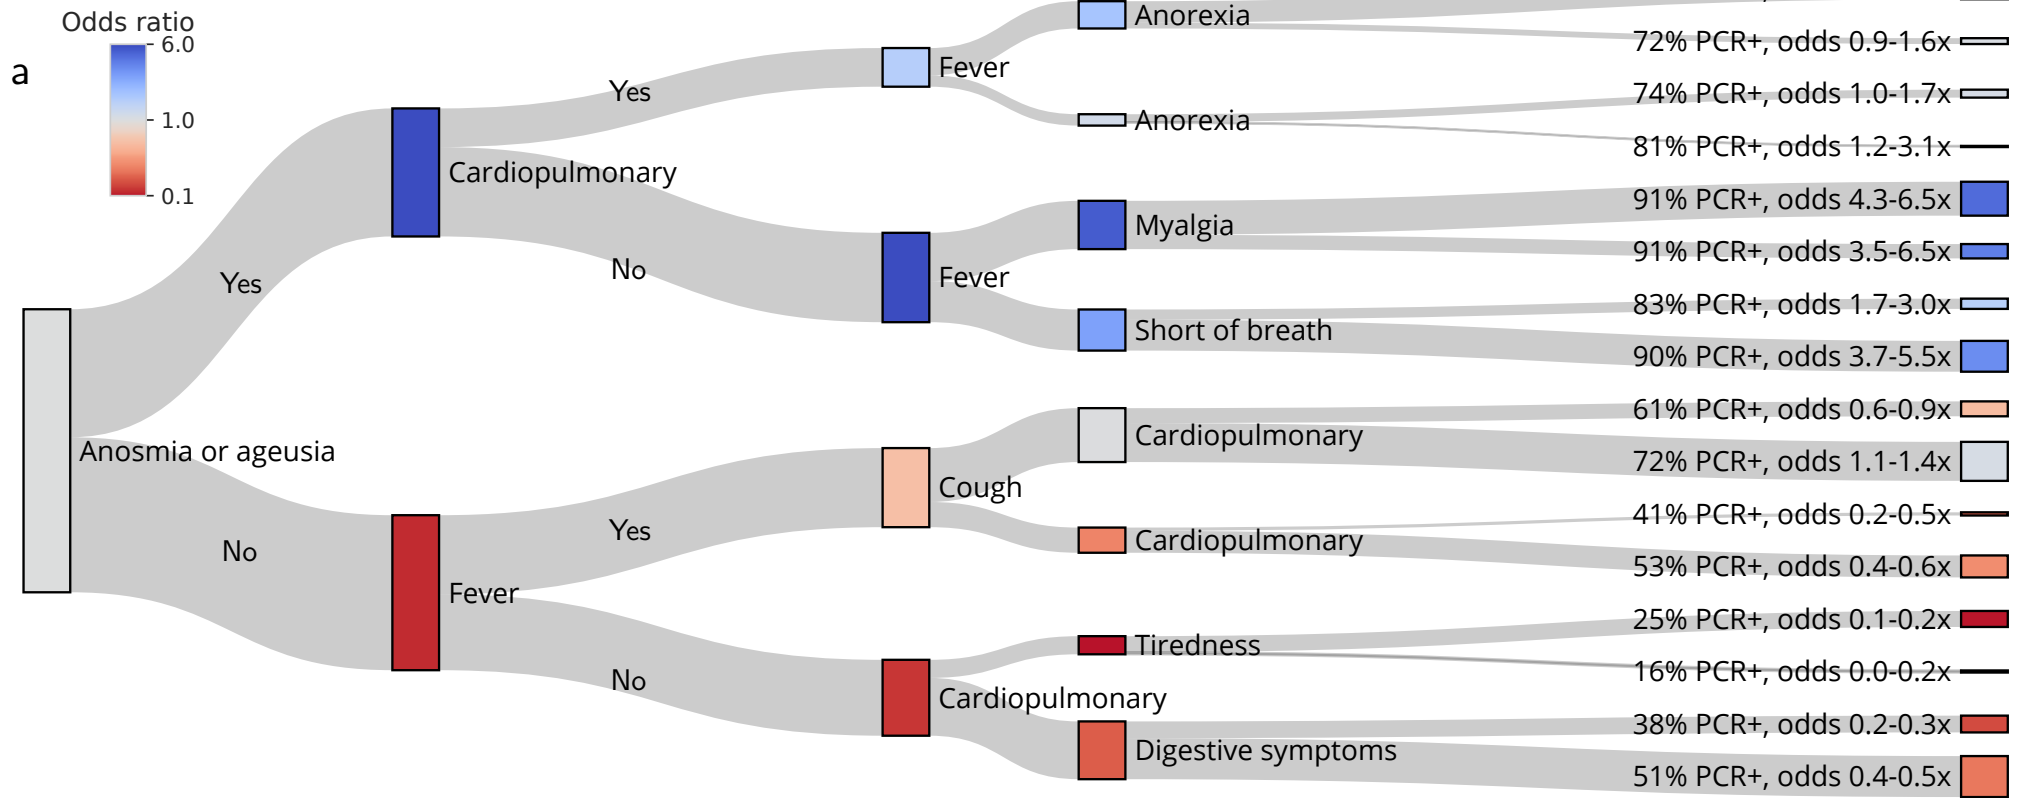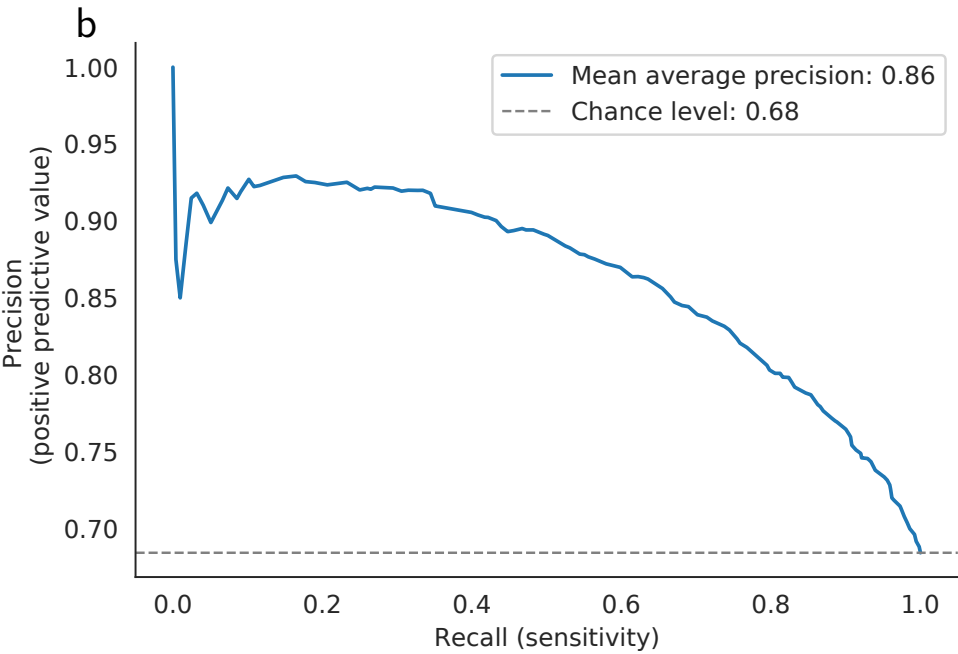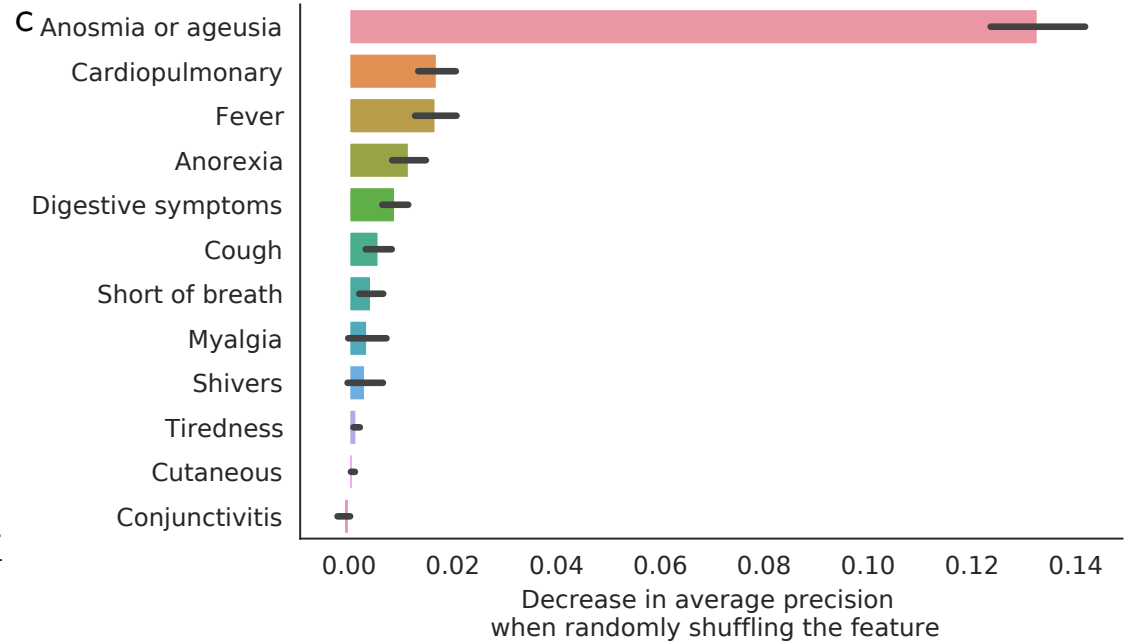

Figure S11

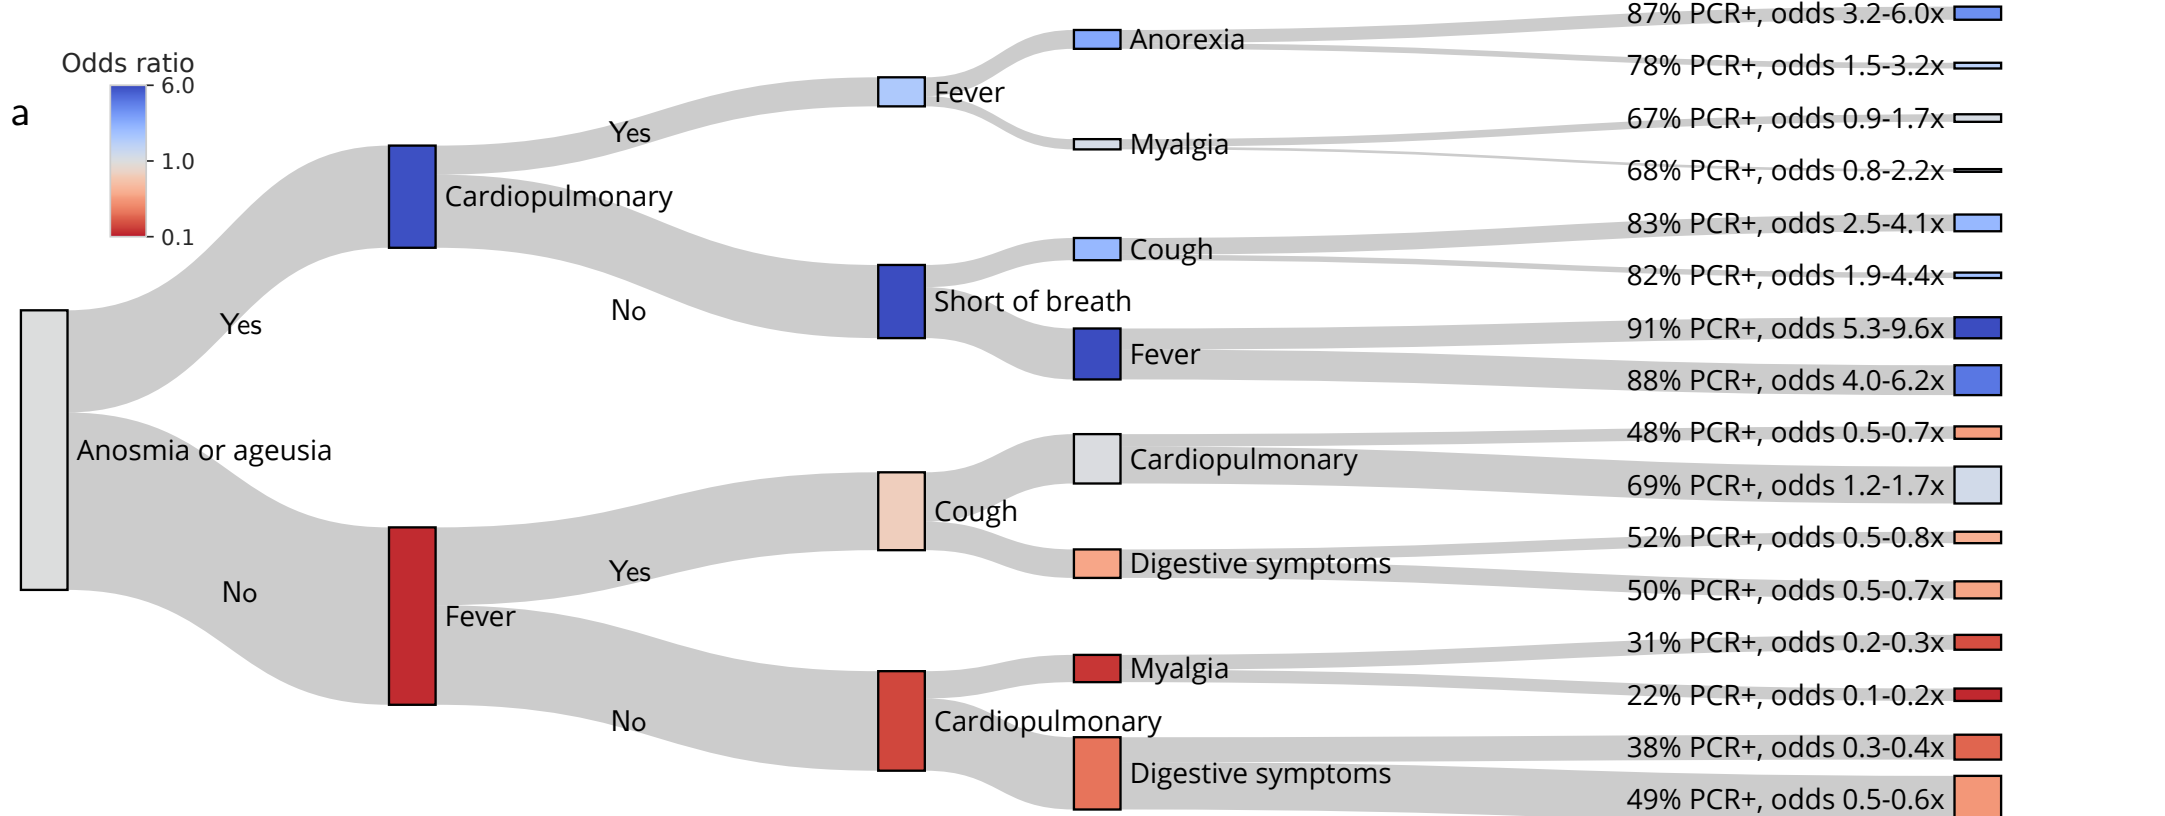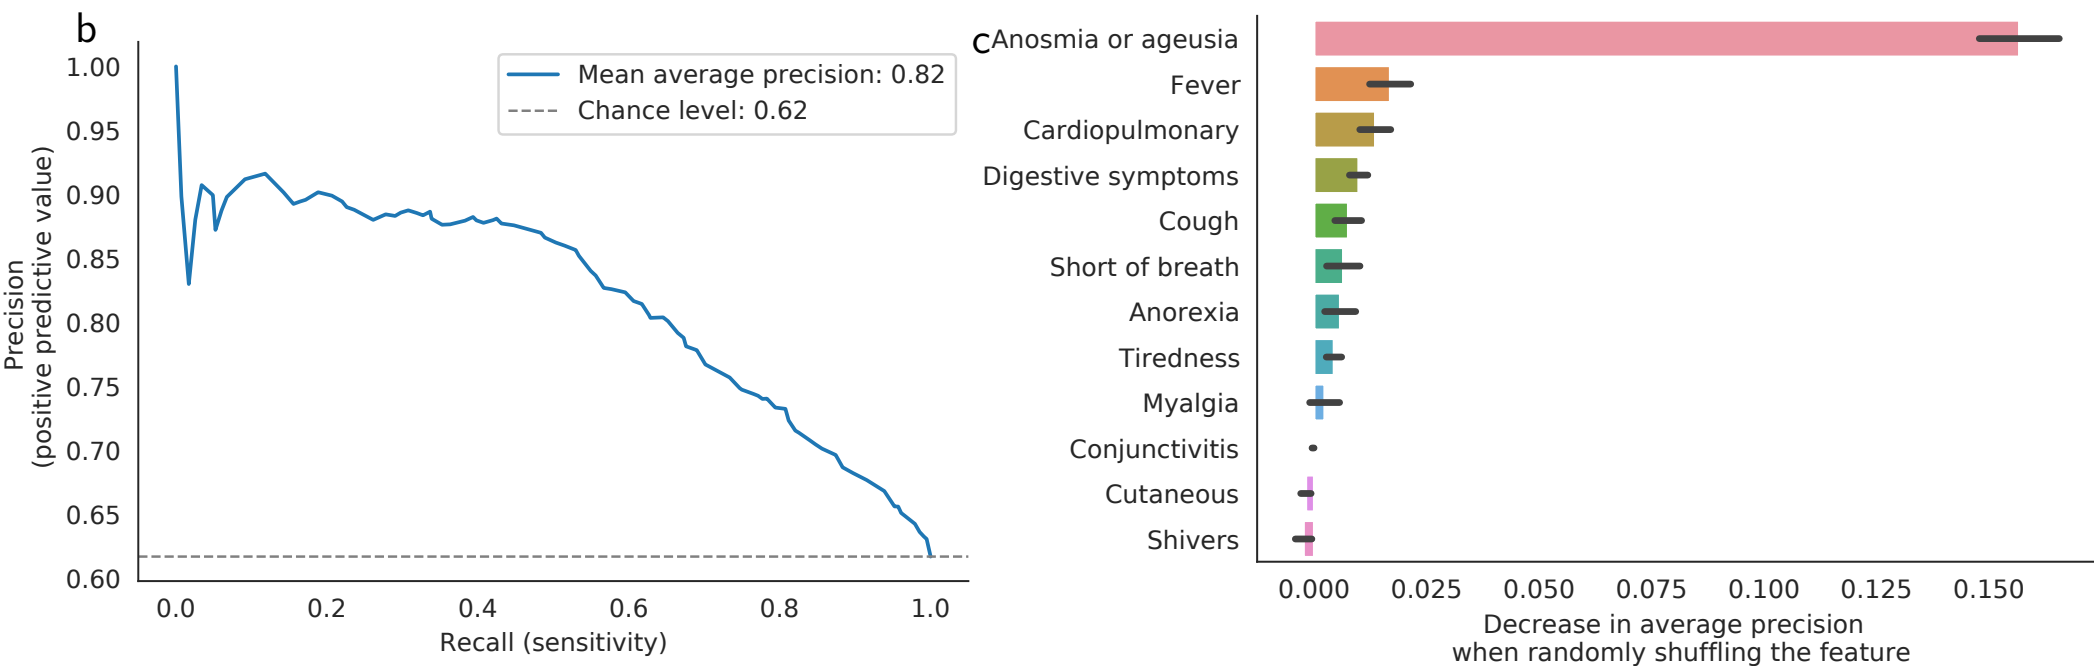

Supplement: 41598_2021_99991_MOESM1_ESM.pdf [file 41598_2021_99991_MOESM1_ESM.pdf]
